# Supplementary material for: A comparison study of MnO2 and Mn2O3 as zinc-ion battery cathodes: an experimental and computational investigation
Source: Royal Society of Chemistry journal article supplement (doi:10.1039/d1ra00346a), 2021-01-01
Supplement: d1ra00346a1.pdf [file d1ra00346a1.pdf]

## Supporting Information

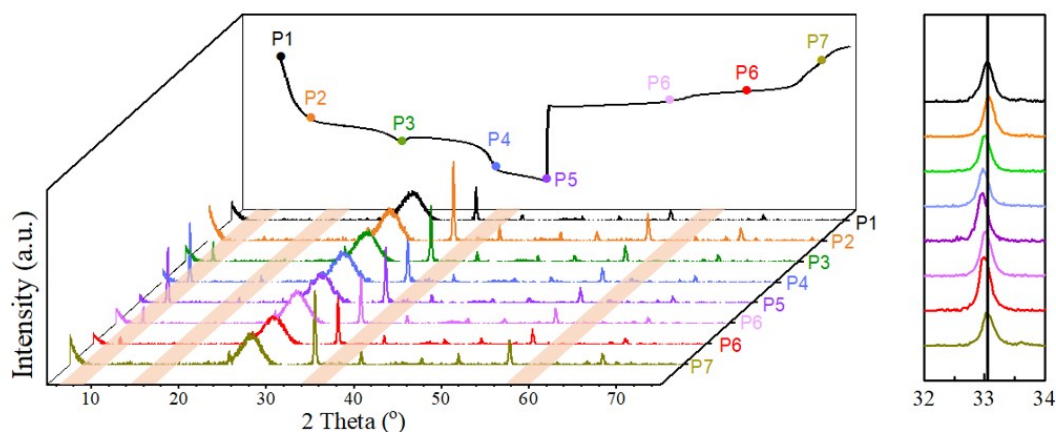

Fig. S1 Ex-situ XRD patterns of Mn<sub>2</sub>O<sub>3</sub> electrode at various charge/discharge states.

In order to reveal the structural transformation of Mn<sub>2</sub>O<sub>3</sub> electrode, ex-situ XRD was carried in various discharging/charging states, as shown in Fig. S1. When discharging to 1 V, the obvious peaks at 8.2°, 16.3°, 35.5° and 58.6° that are covered in pink area appeared and they can be indexed to typical Zn<sub>4</sub>SO<sub>4</sub>(OH)<sub>6</sub> · 5H<sub>2</sub>O (JCPDS: 39-0688). The result is consistent with many previous works about manganese oxide materials [1-4]. The zinc hydroxide sulfate hydrate is formed by integrating the OH<sup>-</sup>, H<sub>2</sub>O and ZnSO<sub>4</sub> in aqueous electrolyte, indicating H<sup>+</sup> is inserted into the Mn<sub>2</sub>O<sub>3</sub> electrode [2]. When the electrode was charged to 1.9 V, the peaks of zinc hydroxide sulfate hydrate gradually disappeared, showing well reversibility of the electrode reaction. In addition, the peak at 33° shifted slightly during the charge and discharge period. According to Bragg's law, the diffraction angles will decrease when lattice spacing increases. So when discharging, the peak of 33° shifted slightly to lower angles can be assigned to the insertion of Zn<sup>2+</sup> in lattice spacing [3,5]. Also, the peak of 33° shifted slightly to higher angles during charging process can be explained by the extraction of Zn<sup>2+</sup>. Based on the above analysis, two energy storage mechanisms can be proposed for the Mn<sub>2</sub>O<sub>3</sub> electrode, involving H<sup>+</sup> and Zn<sup>2+</sup> insertion/extraction, respectively.

### Reference

- [1] Zhang D., Cao J., Zhang X., Insin N., Wang S., Han J. and Huang Y., *Advanced Functional Materials*, 2021, 2009412.
- [2] Liu N., Wu X., Yin Y., Chen A., Zhao C., Guo Z. and Zhang N., *ACS Applied Materials & Interfaces*, 2020, **12**, 28199-28205.
- [3] Liu C., Li Q., Sun H., Wang Z., Gong W., Cong S. and Zhao Z., *Journal of Materials Chemistry A*, 2020, **8**, 24031-24039.

- [4] Zhou Z., Wang L., Liang J., Zhang C., Peng W., Li Y. and Fan X., *Journal of Materials Chemistry C*, 2021, **9**, 1326-1332.
- [5] He P., Yan M., Zhang G., Sun R., Chen L., An Q., and Mai L., *Advanced Energy Materials*, 2017, **7**, 1601920.
